# Supplementary material for: Coordination chemistry of P, O-bidentate phosphinophenolates with Ga3+ and In3+
Source: Royal Society of Chemistry journal article supplement (doi:10.1039/b501908g), 2005-01-01
Supplement: b501908g.pdf [file b501908g.pdf]

Sample: co256/KS-IV-222

X-ray Structure Report

for

Prof. Chris Orvig

UBC Chemistry

March 23, 2005

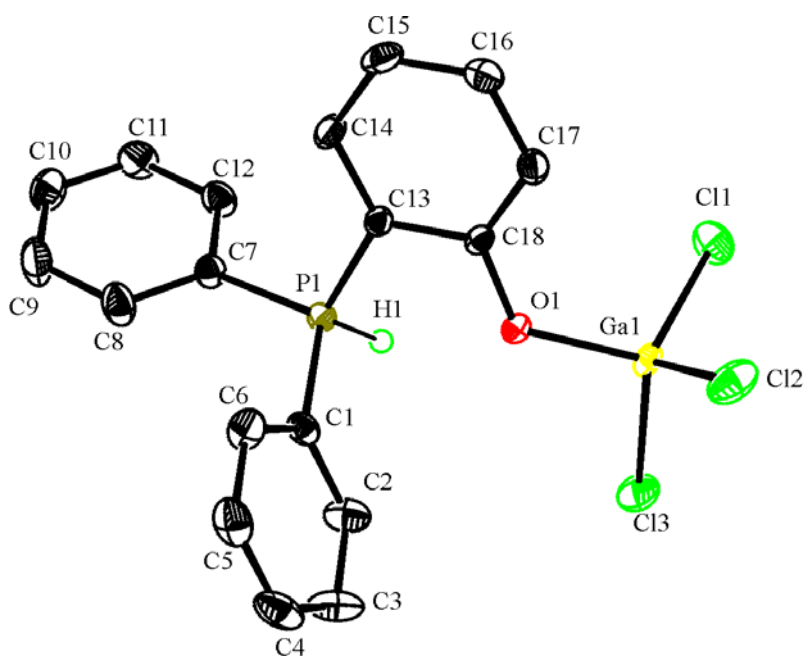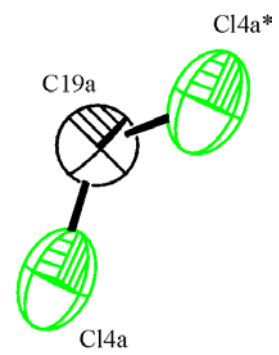

## *Experimental*

### Data Collection

A colourless block crystal of  $C_{18}H_{15}OCl_3PGa.1/2[CH_2Cl_2]$  having approximate dimensions of 0.25 x 0.20 x 0.05 mm was mounted on a glass fiber. All measurements were made on a Rigaku/ADSC diffractometer with graphite monochromated Mo-K $\alpha$  radiation.

The data were collected at a temperature of  $-100.0 \pm 0.1^\circ C$  to a maximum  $2\theta$  value of  $57.4^\circ$ . Data were collected in a series of  $\phi$  and  $\omega$  scans in  $0.50^\circ$  oscillations with 58.0 second exposures. The crystal-to-detector distance was 39.17 mm.

### Data Reduction

Of the 9559 reflections that were collected, 4272 were unique ( $R_{int} = 0.037$ ); equivalent reflections were merged. Data were collected and processed the d\*TREK<sup>1</sup> software package. The linear absorption coefficient,  $\mu$ , for Mo-K $\alpha$  radiation is  $18.97 \text{ cm}^{-1}$ . Data were corrected for absorption effects using a multi-scan technique (d\*TREK), with normalized minimum and maximum transmission coefficients of 0.752 and 1.000, respectively. The data were corrected for Lorentz and polarization effects.

### Structure Solution and Refinement

The structure was solved by direct methods<sup>2</sup>. The material crystallizes with one half-molecule of  $CH_2Cl_2$ , disordered in three orientations about an inversion centre. Populations were refined such that the sum of the three Cl fragments in the asymmetric unit equaled 1 (within experimental error). Restraints were employed to maintain reasonable C-Cl bond distances. All non-hydrogen atoms except those of the disordered solvent molecule were refined anisotropically. Hydrogen H1 was located in a difference map and refined isotropically, all other hydrogen atoms were included in calculated positions but not refined. The final cycle of full-matrix least-squares refinement<sup>3</sup> on  $F^2$  was based on 4272 reflections and 252 variable parameters and converged (largest parameter shift was 0.00 times its esd) with unweighted and weighted agreement factors of:

$$R1 = \sum ||F_o| - |F_c|| / \sum |F_o| = 0.041$$

$$wR2 = [ \sum ( w (F_o^2 - F_c^2)^2 ) / \sum w(F_o^2)^2 ]^{1/2} = 0.086$$

The standard deviation of an observation of unit weight<sup>4</sup> was 1.06. The weighting scheme was based on counting statistics. The maximum and minimum peaks on the final difference Fourier map corresponded to 0.64 and  $-0.59 \text{ e}^{-}/\text{\AA}^3$ , respectively.

Neutral atom scattering factors were taken from Cromer and Waber<sup>5</sup>. Anomalous dispersion effects were included in Fcalc<sup>6</sup>; the values for  $\Delta f'$  and  $\Delta f''$  were those of Creagh and McAuley<sup>7</sup>. The values for the mass attenuation coefficients are those of Creagh and Hubbell<sup>8</sup>. All refinements were performed using SHELXL-97<sup>9</sup>.

### References

- (1) d\*TREK. Area Detector Software. Version 4.13. Molecular Structure Corporation (1996-1998).
- (2) SIR97 - Altomare A., Burla M.C., Camalli M., Cascarano G.L., Giacovazzo C. , Guagliardi A., Moliterni A.G.G., Polidori G., Spagna R. (1999) J. Appl. Cryst. 32, 115-119.
- (3) Least Squares function minimized:
- $$\sum w(F_o^2 - F_c^2)^2$$
- (4) Standard deviation of an observation of unit weight:
- $$[\sum w(F_o^2 - F_c^2)^2 / (N_o - N_v)]^{1/2}$$
- where:  $N_o$  = number of observations  
 $N_v$  = number of variables
- (5) Cromer, D. T. & Waber, J. T.; "International Tables for X-ray Crystallography", Vol. IV, The Kynoch Press, Birmingham, England, Table 2.2 A (1974).
- (6) Ibers, J. A. & Hamilton, W. C.; Acta Crystallogr., 17, 781 (1964).
- (7) Creagh, D. C. & McAuley, W.J. ; "International Tables for Crystallography", Vol C, (A.J.C. Wilson, ed.), Kluwer Academic Publishers, Boston, Table 4.2.6.8, pages 219-222 (1992).
- (8) Creagh, D. C. & Hubbell, J.H.; "International Tables for Crystallography", Vol C, (A.J.C. Wilson, ed.), Kluwer Academic Publishers, Boston, Table 4.2.4.3, pages 200-206 (1992).
- (9) Sheldrick, G. M. SHELXL-97. Programs for Crystal Structure Analysis (Release 97-2). University of Göttingen, Germany (1997).
